# Supplementary material
Source: PubMed Central journal article supplement (PMC5397318)
Supplement: NIHMS835673-supplement-Supp_info.pdf [file NIHMS835673-supplement-Supp_info.pdf]

## **ONLINE SUPPLEMENT.**

### **A. METHODS:**

**Mice and hydrodynamic tail vein injections.** A list of all mice used in the study is provided in Supplementary table 1. Wild-type FVB/N mice were obtained from the Jackson Laboratory (Harbor, ME). Hydrodynamic injection was performed as described previously (1, 2). Briefly, 20  $\mu\text{g}$  of pT3-EF5 $\alpha$ -G12D-mutant-K-Ras and pT3-EF5 $\alpha$ -S33Y-mutant- $\beta$ -catenin-Myc-Tag or pT3-EF5 $\alpha$ -G12D-mutant-K-Ras and pT3-EF5 $\alpha$ -S45Y-mutant- $\beta$ -catenin-Myc-Tag along with SB transposase in a ratio of 25:1 were diluted in 2 ml of 0.9% NaCl, filtered through 0.22  $\mu\text{m}$  filter (Millipore), and injected into the lateral tail vein of 6 to 8 weeks old FVB/N mice in 5-7 seconds. The injections were repeated for each group in combination with pT3-EF5 $\alpha$ -dnTCF4 or pT3 plasmid only. Mice were housed, fed, and monitored in accordance with protocols approved by the Institutional Animal Care and Use Committee at the University of Pittsburgh. All animals were carefully monitored for signs of morbidity or discomfort. Close attention was paid to the abdominal girth. Animals were euthanized at specific time points after injection or at the earliest signs of morbidity.

**Immunohistochemistry.** Liver specimens were fixed in 10% buffered and embedded in paraffin. Hematoxylin & Eosin (H&E) staining on 4 $\mu\text{m}$  liver sections was performed to note the appearance and characteristics of preneoplastic and neoplastic foci at different times after tail vein injection. Immunohistochemistry was performed on these sections as well as described previously (1, 2). Briefly, deparaffinized sections were incubated in 3% H<sub>2</sub>O<sub>2</sub> dissolved in 1X phosphate-buffered saline (PBS) for 30 minutes to quench the

endogenous peroxidase. For antigen retrieval, slides were microwaved in 10 mM citrate buffer (pH 6.0) for 12 minutes. Subsequently, slides were incubated with primary antibodies overnight at 4°C. Primary antibodies used in the study include Ki-67 (NM-sP6; Thermo Fisher Scientific), TUNEL (Kit; S7100; EMD Millipore), Myc-Tag (SC-788; Santa Cruz), Cyclin-D1 (Rb-9041-P; Thermo Fisher Scientific) and GS (SC-74430; Santa Cruz). After washes, the sections were incubated in the appropriate biotin-conjugated secondary antibody (Chemicon, Temecula, CA), for 30 minutes at room temperature. Signal was detected using the Vectastain ABC Elite kit (Vector Laboratories, Inc., Burlingame, CA) and developed using DAB (Vector Laboratories, Inc., Burlingame, CA). Sections were counterstained with Shandon Hematoxylin solution (Thermo Fisher Scientific, Pittsburgh, PA), subjected to dehydration process and covered-slipped. For negative control, the sections were incubated with secondary antibodies only or with control IgG.

For quantification of TUNEL staining, 5 random fields at 50x magnification were counted from each section after 3<sup>rd</sup> cycle of Scr. LNP and CTNNB1-LNP treatment for TUNEL-positive cells. Statistical comparison was performed by unpaired T test using Prism 6 for Mac OS X (GraphPad Software Inc., La Jolla, CA).

**Protein isolation and western blots.** Liver tissues from age matched control FVB/N mice or various treatment groups were homogenized in lysis buffer [30 mM Tris (pH 7.5), 150 mM NaCl, 1% NP-40, 0.5% Na deoxycholate, 0.1% SDS] containing the Complete Protease and Phosphatase Inhibitor Cocktail (Roche Molecular Biochemicals). Protein concentrations were determined with the Bio-Rad Protein Assay Kit (Bio-Rad, Hercules, CA) using bovine serum albumin as a standard. Aliquots of 50 µg lysates were

denatured by boiling in Tris-Glycine SDS Sample Buffer (Life Technologies, Carlsbad, CA), resolved by SDS PAGE, and transferred to nitrocellulose membranes (Bio-Rad, Hercules, CA) using the Biorad transfer apparatus. Membranes were blocked in 5% BSA in Tris-buffered saline containing 0.1% Tween 20 for 1 hour and probed with various primary antibodies in Supplementary Table 2. Each primary antibody was followed by incubation with horseradish peroxidase-secondary antibody diluted 1:10,000 for 1 hour. After appropriate washing, the signal was developed with the Super Signal West Pico or Super Signal West Femto (Thermo Fisher Scientific, Waltham, MA).

**Microarray analysis.** Liver tissues from control male FVB mice (n=4) and tumor bearing G12D-K-Ras-S45Y- $\beta$ -catenin mice (n=4; Range-6-7 weeks post injection) and G12D-K-Ras-S33Y- $\beta$ -catenin mice (n=4; Range-7-8 weeks post injection) were used to isolate mRNA and preparation of probes for hybridization on the Affymetrix R430 2.0 mouse array as described previously (2). Analysis of array data was performed in R statistical package. Microarray data was normalized using the `expresso` function from the "affy" Bioconductor package (3) with parameters as follows: `normalize.method="quantiles"`, `bgcorrect.method="rma"`, `pmcorrect.method="pmonly"`, `summary.method="medianpolish"`. The probes were mapped to genes using the custom brainarray CDF (4). Differential expression between normal and tumor samples was determined using the "limma" Bioconductor package (5), using the age of the mouse as a covariate. We compared both the G12D-K-Ras-S45Y- $\beta$ -catenin and G12D-K-Ras-S33Y- $\beta$ -catenin mutants against normal livers and found the two mutations to induce highly similar transcriptional changes and samples bearing the two mutations were pooled for subsequent analysis. We also compared the pooled data from G12D-K-Ras-

S45Y- $\beta$ -catenin and G12D-K-Ras-S33Y- $\beta$ -catenin mutants against the pooled data from previously published hMet-S45Y- $\beta$ -catenin and hMet-S33Y- $\beta$ -catenin mutants (2).

**Animal treatment with lipid nanoparticle (LNP) formulation containing Dicer substrate small interfering RNA (DsiRNA) against  $\beta$ -catenin gene.** The generation of lipid nanoparticle (LNP) carrying DsiRNA against CTNNB1 was described in a previous publication (6). To test efficacy of this agent in suppressing  $\beta$ -catenin and its affect on HCC, mice were injected with pT3-EF5 $\alpha$ -G12D-mutant-K-Ras and pT3-EF5 $\alpha$ -S45Y-mutant- $\beta$ -catenin-Myc-Tag along with SB transposase as described above. Mice were randomized into three groups at 5 weeks based on treatment, group 1 received PBS (n=7), group 2 received LNP with DsiRNA against a scrambled sequence (Scr. LNP; 3mg/kg/dose) (n=11), and group 3 received LNP with DsiRNA against CTNNB1 (3mg/kg/dose) (n=12). Treatments were performed every 24 hours intravenously via lateral tail vein injection for 3 days followed by no injection for 4 days. Similar cycles were repeated 2 or 3 times. Mice were harvested after 1, 2 and 3 cycles ( $n \geq 3$ /group) and compared for LW/BW ratio,  $\beta$ -catenin signaling and Ras signaling by WB analysis and immunohistochemistry.

**Statistical analysis.** Where applicable all data is presented as mean  $\pm$  standard error (SE). Statistical differences among the various groups were assessed with Tukey-Kramer's test and p value < 0.05 was considered statistically significant. All statistics were performed with Prism 6, version 6.0 (GraphPad Software Inc., La Jolla, CA).

## **B. REFERENCES:**

1. Tao J, Calvisi DF, Ranganathan S, Cigliano A, Zhou L, Singh S, Jiang L, et al. Activation of beta-catenin and Yap1 in human hepatoblastoma and induction of hepatocarcinogenesis in mice. *Gastroenterology* 2014;147:690-701.
2. Tao J, Xu E, Zhao Y, Singh S, Li X, Couchy G, Chen X, et al. Modeling a Human HCC Subset in Mice Through Co-Expression of Met and Point-Mutant beta-Catenin. *Hepatology* 2016.
3. Gautier L, Cope L, Bolstad BM, Irizarry RA. affy--analysis of Affymetrix GeneChip data at the probe level. *Bioinformatics* 2004;20:307-315.
4. Sandberg R, Larsson O. Improved precision and accuracy for microarrays using updated probe set definitions. *BMC Bioinformatics* 2007;8:48.
5. Ritchie ME, Phipson B, Wu D, Hu Y, Law CW, Shi W, Smyth GK. limma powers differential expression analyses for RNA-sequencing and microarray studies. *Nucleic Acids Res* 2015;43:e47.
6. Ganesh S, Koser M, Cyr W, Chopda G, Tao J, Shui X, Ying B, et al. Direct pharmacological inhibition of beta-catenin by RNA interference in tumors of diverse origin. *Mol Cancer Ther* 2016.

## C. ONLINE SUPPLEMENTARY TABLES

**Supplementary Table 1: Mice used in the study.**

| No. | Mouse                              | Plasmid                                                     | Sex  | Strain | Harvest (Weeks post-inj.) | Liver phenotype | Body weight (gm) | Liver weight (gm) | LW/BW (%)   |
|-----|------------------------------------|-------------------------------------------------------------|------|--------|---------------------------|-----------------|------------------|-------------------|-------------|
| 101 | Kras- beta-catenin s33y M1w        | Kras(20ug)-beta-catenin s33y(20ug)-sb(1.6ug)                | Male | FVB    | 1                         | Normal          | 22.905           | 1.519             | 6.631739795 |
| 102 | Kras- beta-catenin s33y M2w        | Kras(20ug)-beta-catenin s33y(20ug)-sb(1.6ug)                | Male | FVB    | 2                         | Normal          | 24.985           | 1.509             | 6.039623774 |
| 103 | Kras- beta-catenin s33y M3w        | Kras(20ug)-beta-catenin s33y(20ug)-sb(1.6ug)                | Male | FVB    | 3                         | Normal          | 25.002           | 1.636             | 6.543476522 |
| 104 | Kras- beta-catenin s33y M4w        | Kras(20ug)-beta-catenin s33y(20ug)-sb(1.6ug)                | Male | FVB    | 4                         | Normal          | 24.709           | 1.712             | 6.92864948  |
| 105 | Kras- beta-catenin s33y M7W        | Kras(20ug)-beta-catenin s33y(20ug)-sb(1.6ug)                | Male | FVB    | 7                         | Tumor           | 30.203           | 5.549             | 18.37234712 |
| 106 | Kras- beta-catenin s33y M8W-1      | Kras(20ug)-beta-catenin s33y(20ug)-sb(1.6ug)                | Male | FVB    | 8                         | Tumor           | 28.938           | 5.897             | 20.37804962 |
| 107 | Kras- beta-catenin s33y M8W-2      | Kras(20ug)-beta-catenin s33y(20ug)-sb(1.6ug)                | Male | FVB    | 8                         | Tumor           | 30.867           | 5.781             | 18.72873943 |
| 108 | Kras- beta-catenin s33y M8W-3      | Kras(20ug)-beta-catenin s33y(20ug)-sb(1.6ug)                | Male | FVB    | 8                         | Tumor           | 28.025           | 6.043             | 21.56289028 |
| 109 | kras beta-catenin s33y PT3 M7W-1   | Kras(20ug)-beta-catenin s33y(20ug)-PT3MCS(60ug) - sb(4.0ug) | Male | FVB    | 7                         | Tumor           | 30.749           | 5.558             | 18.07538457 |
| 110 | kras beta-catenin s33y PT3 M7W-2   | Kras(20ug)-beta-catenin s33y(20ug)-PT3MCS(60ug) - sb(4.0ug) | Male | FVB    | 7                         | Tumor           | 28.28            | 5.598             | 19.79490806 |
| 111 | kras beta-catenin s33y PT3 M7W-3   | Kras(20ug)-beta-catenin s33y(20ug)-PT3MCS(60ug) - sb(4.0ug) | Male | FVB    | 7                         | Tumor           | 29.943           | 7.142             | 23.85198544 |
| 112 | kras beta-catenin s33y PT3 M7W-4   | Kras(20ug)-beta-catenin s33y(20ug)-PT3MCS(60ug) - sb(4.0ug) | Male | FVB    | 7                         | Tumor           | 25.834           | 5.786             | 22.39684137 |
| 113 | kras beta-catenin S33Y dnTCF4 M9W  | Kras(20ug)-beta-catenin s33y(20ug)-dnTCF4(60ug) - sb(4.0ug) | Male | FVB    | 9                         | Normal          | 28.73            | 1.453             | 5.057431257 |
| 114 | kras beta-catenin S33Y dnTCF4 M10W | Kras(20ug)-beta-catenin s33y(20ug)-dnTCF4(60ug) - sb(4.0ug) | Male | FVB    | 10                        | Normal          | 30.823           | 1.809             | 5.868993933 |

|     |                                      |                                                             |      |     |     |              |        |       |             |
|-----|--------------------------------------|-------------------------------------------------------------|------|-----|-----|--------------|--------|-------|-------------|
| 115 | kras beta-catenin S33Y dnTCF4 M12W-1 | Kras(20ug)-beta-catenin s33y(20ug)-dnTCF4(60ug) - sb(4.0ug) | Male | FVB | 12  | Normal       | 29.923 | 1.482 | 4.952711961 |
| 116 | kras beta-catenin S33Y dnTCF4 M12W-2 | Kras(20ug)-beta-catenin s33y(20ug)-dnTCF4(60ug) - sb(4.0ug) | Male | FVB | 12  | Normal       | 26.984 | 1.401 | 5.191965609 |
| 117 | Kras- beta-catenin s45y M1w          | Kras(20ug)-beta-catenin s45y(20ug)-sb(1.6ug)                | Male | FVB | 1   | Normal       | 27.995 | 1.845 | 6.590462583 |
| 118 | Kras- beta-catenin s45y M2w          | Kras(20ug)-beta-catenin s45y(20ug)-sb(1.6ug)                | Male | FVB | 2   | Normal       | 25.44  | 2.091 | 8.219339623 |
| 119 | Kras- beta-catenin s45y M3w          | Kras(20ug)-beta-catenin s45y(20ug)-sb(1.6ug)                | Male | FVB | 3   | Small tumors | 23.343 | 2.709 | 11.60519213 |
| 120 | Kras- beta-catenin s45y M4w          | Kras(20ug)-beta-catenin s45y(20ug)-sb(1.6ug)                | Male | FVB | 4   | Small tumors | 25.283 | 3.202 | 12.66463632 |
| 121 | Kras- beta-catenin s45y M6W-1        | Kras(20ug)-beta-catenin s45y(20ug)-sb(1.6ug)                | Male | FVB | 6   | Tumor        | 30.118 | 6.476 | 21.50209177 |
| 122 | Kras- beta-catenin s45y M6W-2        | Kras(20ug)-beta-catenin s45y(20ug)-sb(1.6ug)                | Male | FVB | 6   | Tumor        | 29.951 | 7.691 | 25.67860839 |
| 123 | Kras- beta-catenin s45y M6W-3        | Kras(20ug)-beta-catenin s45y(20ug)-sb(1.6ug)                | Male | FVB | 6   | Tumor        | 31.183 | 4.672 | 14.98252253 |
| 124 | Kras- beta-catenin s45y M6W-4        | Kras(20ug)-beta-catenin s45y(20ug)-sb(1.6ug)                | Male | FVB | 6   | Tumor        | 27.584 | 6.15  | 22.29553364 |
| 125 | kras beta-catenin s45y PT3 M6.4W-1   | Kras(20ug)-beta-catenin s45y(20ug)-PT3MCS(60ug) - sb(4.0ug) | Male | FVB | 6.4 | Tumor        | 29.402 | 6.673 | 22.69573498 |
| 126 | kras beta-catenin s45y PT3 M6.4W-2   | Kras(20ug)-beta-catenin s45y(20ug)-PT3MCS(60ug) - sb(4.0ug) | Male | FVB | 6.4 | Tumor        | 30.113 | 6.772 | 22.48862617 |
| 127 | kras beta-catenin s45y PT3 M6.4W-3   | Kras(20ug)-beta-catenin s45y(20ug)-PT3MCS(60ug) - sb(4.0ug) | Male | FVB | 6.4 | Tumor        | 30.467 | 6.592 | 21.63652476 |
| 128 | kras beta-catenin s45y PT3 M6.4W-4   | Kras(20ug)-beta-catenin s45y(20ug)-PT3MCS(60ug) - sb(4.0ug) | Male | FVB | 6.4 | Tumor        | 28.612 | 7.176 | 25.08038585 |
| 129 | kras beta-catenin s45y dnTCF4 M9W    | Kras(20ug)-beta-catenin s45y(20ug)-dnTCF4(60ug) - sb(4.0ug) | Male | FVB | 9   | Normal       | 30.442 | 1.581 | 5.193482688 |
| 130 | kras beta-catenin s45y dnTCF4 M10W   | Kras(20ug)-beta-catenin s45y(20ug)-dnTCF4(60ug) - sb(4.0ug) | Male | FVB | 10  | Normal       | 26.54  | 1.389 | 5.233609646 |
| 131 | kras beta-catenin s45y dnTCF4 M12W-1 | Kras(20ug)-beta-catenin s45y(20ug)-dnTCF4(60ug) - sb(4.0ug) | Male | FVB | 12  | Normal       | 33.196 | 1.386 | 4.175201832 |

|     |                                      |                                                             |      |     |     |              |        |       |             |
|-----|--------------------------------------|-------------------------------------------------------------|------|-----|-----|--------------|--------|-------|-------------|
| 132 | kras beta-catenin s45y dnTCF4 M12W-2 | Kras(20ug)-beta-catenin s45y(20ug)-dnTCF4(60ug) - sb(4.0ug) | Male | FVB | 12  | Normal       | 32.075 | 1.402 | 4.371005456 |
| 137 | kras control1                        | Kras(20ug)-beta-catenin s45y(20ug)-sb(1.6ug)                | Male | FVB | 7.8 | Tumor        | 30.206 | 7.918 | 26.2133351  |
| 138 | kras control2                        | Kras(20ug)-beta-catenin s45y(20ug)-sb(1.6ug)                | Male | FVB | 7.8 | Tumor        | 28.307 | 5.827 | 20.58501431 |
| 139 | kras control3                        | Kras(20ug)-beta-catenin s45y(20ug)-sb(1.6ug)                | Male | FVB | 8.6 | Tumor        | 22.931 | 3.856 | 16.81566438 |
| 140 | kras control4                        | Kras(20ug)-beta-catenin s45y(20ug)-sb(1.6ug)                | Male | FVB | 8.6 | Tumor        | 29.586 | 5.857 | 19.79652538 |
| 141 | kras drug 1                          | Kras(20ug)-beta-catenin s45y(20ug)-sb(1.6ug)                | Male | FVB | 7.8 | Small tumors | 28.807 | 1.908 | 6.623390148 |
| 142 | kras drug 2                          | Kras(20ug)-beta-catenin s45y(20ug)-sb(1.6ug)                | Male | FVB | 8.6 | Tumor        | 29.627 | 3.587 | 12.10719951 |
| 143 | kras drug 3                          | Kras(20ug)-beta-catenin s45y(20ug)-sb(1.6ug)                | Male | FVB | 9.6 | Small tumors | 30.501 | 1.923 | 6.304711321 |
| 144 | kras pbs 5w-1                        | Kras(20ug)-beta-catenin s45y(20ug)-sb(1.6ug)                | Male | FVB | 5   | Small tumors | 28.253 | 3.805 | 13.46759636 |
| 145 | kras pbs 5w-2                        | Kras(20ug)-beta-catenin s45y(20ug)-sb(1.6ug)                | Male | FVB | 5   | Small tumors | 27.268 | 3.745 | 13.73404723 |
| 146 | kras pbs 5.8w-1                      | Kras(20ug)-beta-catenin s45y(20ug)-sb(1.6ug)                | Male | FVB | 5.8 | Tumor        | 27.369 | 5.329 | 19.47093427 |
| 147 | kras pbs 5.8w-2                      | Kras(20ug)-beta-catenin s45y(20ug)-sb(1.6ug)                | Male | FVB | 5.8 | Tumor        | 26.125 | 3.529 | 13.50813397 |
| 148 | kras pbs 5.8w-3                      | Kras(20ug)-beta-catenin s45y(20ug)-sb(1.6ug)                | Male | FVB | 5.8 | Tumor        | 27.319 | 4.491 | 16.43910831 |
| 149 | kras pbs 6w                          | Kras(20ug)-beta-catenin s45y(20ug)-sb(1.6ug)                | Male | FVB | 6   | Tumor        | 22.952 | 4.508 | 19.64098989 |
| 150 | kras pbs 7w                          | Kras(20ug)-beta-catenin s45y(20ug)-sb(1.6ug)                | Male | FVB | 7   | Tumor        | 29.403 | 4.572 | 15.54943373 |
| 151 | kras control 5w-1                    | Kras(20ug)-beta-catenin s45y(20ug)-sb(1.6ug)                | Male | FVB | 5   | Small tumors | 27.859 | 3.595 | 12.90426792 |
| 152 | kras control 5w-2                    | Kras(20ug)-beta-catenin s45y(20ug)-sb(1.6ug)                | Male | FVB | 5   | Small tumors | 27.896 | 2.496 | 8.947519358 |
| 153 | kras control 5.8w-1                  | Kras(20ug)-beta-catenin s45y(20ug)-sb(1.6ug)                | Male | FVB | 5.8 | Tumor        | 27.791 | 6.029 | 21.69407362 |
| 154 | kras control 5.8w-2                  | Kras(20ug)-beta-catenin s45y(20ug)-sb(1.6ug)                | Male | FVB | 5.8 | Tumor        | 27.201 | 4.296 | 15.793537   |
| 155 | kras control 5.8w-3                  | Kras(20ug)-beta-catenin s45y(20ug)-sb(1.6ug)                | Male | FVB | 5.8 | Tumor        | 29.962 | 2.387 | 7.966757893 |



|     |                 |                                                 |      |     |     |              |        |       |             |
|-----|-----------------|-------------------------------------------------|------|-----|-----|--------------|--------|-------|-------------|
| 156 | kras control 6w | Kras(20ug)-beta-catenin<br>s45y(20ug)-sb(1.6ug) | Male | FVB | 6   | Tumor        | 28.204 | 6.17  | 21.8763296  |
| 157 | kras control 7w | Kras(20ug)-beta-catenin<br>s45y(20ug)-sb(1.6ug) | Male | FVB | 7   | Tumor        | 29.115 | 6.892 | 23.67164692 |
| 158 | kras drug 5w-1  | Kras(20ug)-beta-catenin<br>s45y(20ug)-sb(1.6ug) | Male | FVB | 5   | Normal       | 25.893 | 1.803 | 6.963271927 |
| 159 | kras drug 5w-2  | Kras(20ug)-beta-catenin<br>s45y(20ug)-sb(1.6ug) | Male | FVB | 5   | Normal       | 24.495 | 1.795 | 7.328026128 |
| 160 | kras drug 5w-3  | Kras(20ug)-beta-catenin<br>s45y(20ug)-sb(1.6ug) | Male | FVB | 5   | Normal       | 27.119 | 1.952 | 7.197905527 |
| 161 | kras dug 5.8w-1 | Kras(20ug)-beta-catenin<br>s45y(20ug)-sb(1.6ug) | Male | FVB | 5.8 | Tumor        | 27.953 | 4.279 | 15.30783816 |
| 162 | kras dug 5.8w-2 | Kras(20ug)-beta-catenin<br>s45y(20ug)-sb(1.6ug) | Male | FVB | 5.8 | Small tumors | 29.192 | 2.12  | 7.262263634 |
| 163 | kras dug 5.8w-3 | Kras(20ug)-beta-catenin<br>s45y(20ug)-sb(1.6ug) | Male | FVB | 5.8 | Small tumors | 26.922 | 1.901 | 7.061139588 |
| 164 | kras drug m7w-1 | Kras(20ug)-beta-catenin<br>s45y(20ug)-sb(1.6ug) | Male | FVB | 7   | Small tumors | 32.374 | 3.363 | 10.38796565 |
| 165 | kras drug m7w-2 | Kras(20ug)-beta-catenin<br>s45y(20ug)-sb(1.6ug) | Male | FVB | 7   | Small tumors | 33.194 | 2.016 | 6.073386757 |
| 166 | kras drug m7w-3 | Kras(20ug)-beta-catenin<br>s45y(20ug)-sb(1.6ug) | Male | FVB | 7   | Small tumors | 25.92  | 1.856 | 7.160493827 |

**Supplementary Table 2: Antibodies used for Western blots.**

| <b>Antibody</b>                | <b>Catalogue Number</b> | <b>Company</b> | <b>Species</b> | <b>Dilution</b> |
|--------------------------------|-------------------------|----------------|----------------|-----------------|
| GAPDH                          | sc-25778                | Santa Cruz     | Rabbit         | 1:1000          |
| Glutamine synthetase           | sc-74430                | Santa Cruz     | Mouse          | 1:1000          |
| Regucalcin                     | sc-130344               | Santa Cruz     | Mouse          | 1:1000          |
| Cyclin-D1                      | sc-753                  | Santa Cruz     | Rabbit         | 1:1000          |
| $\beta$ -Catenin               | sc-7199                 | Santa Cruz     | Rabbit         | 1:1000          |
| LECT2                          | sc-99036                | Santa Cruz     | Rabbit         | 1:500           |
| Myc-tag                        | 2276                    | Cell Signaling | Mouse          | 1:1000          |
| ERK                            | 4695                    | Cell Signaling | Rabbit         | 1:1000          |
| P-ERK                          | 4370                    | Cell Signaling | Rabbit         | 1:1000          |
| AKT                            | 4685                    | Cell Signaling | Rabbit         | 1:1000          |
| P-AKT Ser473                   | 4060                    | Cell Signaling | Rabbit         | 1:1000          |
| mTOR                           | 2983                    | Cell Signaling | Rabbit         | 1:1000          |
| P-Ser2448 mTOR                 | 2971                    | Cell Signaling | Rabbit         | 1:1000          |
| P-Ser2481 mTOR                 | 2974                    | Cell Signaling | Rabbit         | 1:1000          |
| P-EIF4E                        | 9741                    | Cell Signaling | Rabbit         | 1:1000          |
| EIF4E                          | 9742                    | Cell Signaling | Rabbit         | 1:1000          |
| P-4E-BP1                       | 9644                    | Cell Signaling | Rabbit         | 1:1000          |
| P-235/236 S6 Ribosomal Protein | 4585                    | Cell Signaling | Rabbit         | 1:1000          |
| P-240/244 S6 Ribosomal Protein | 5364                    | Cell Signaling | Rabbit         | 1:1000          |

## D. ONLINE FIGURES

Online Figure 1.

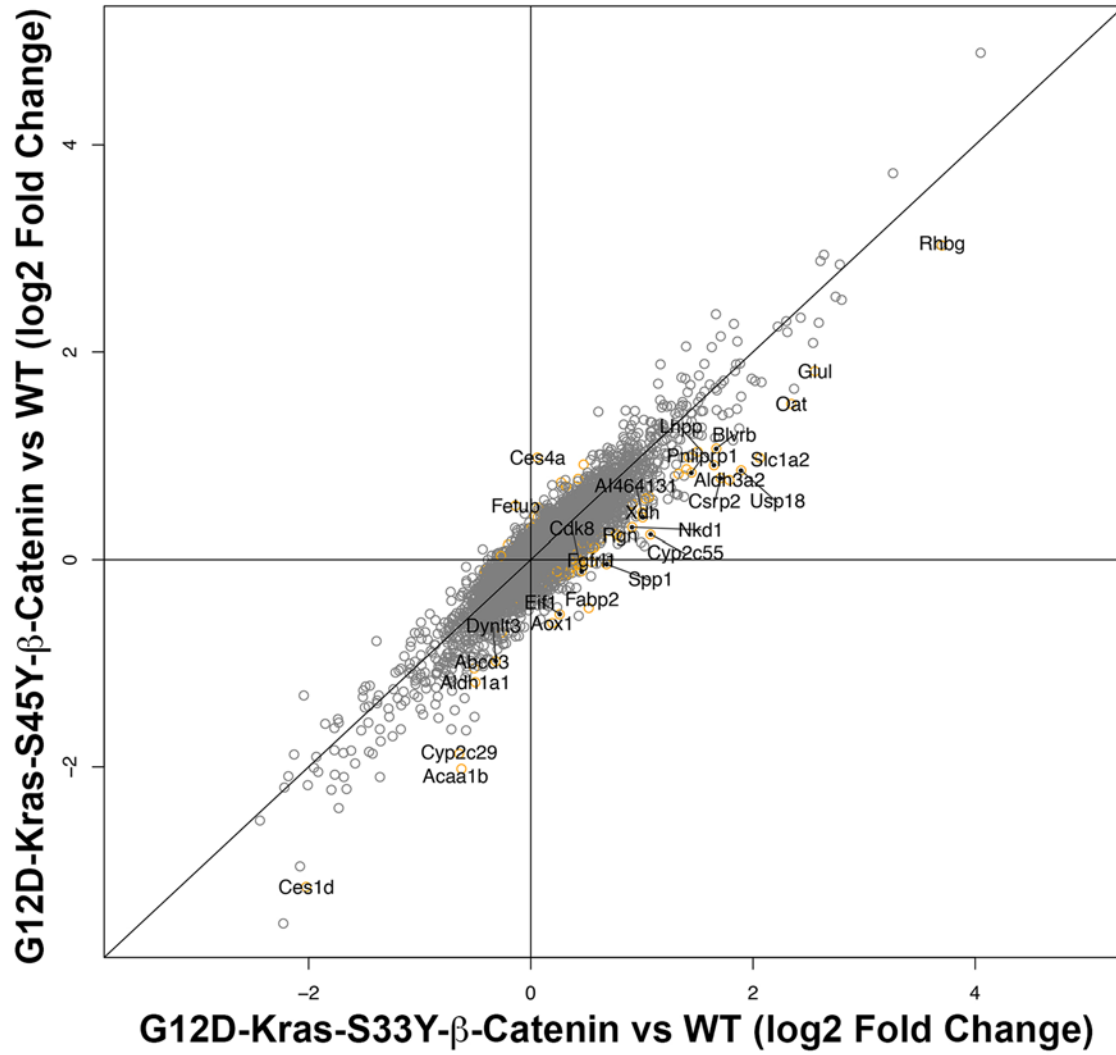

Online Figure 2.

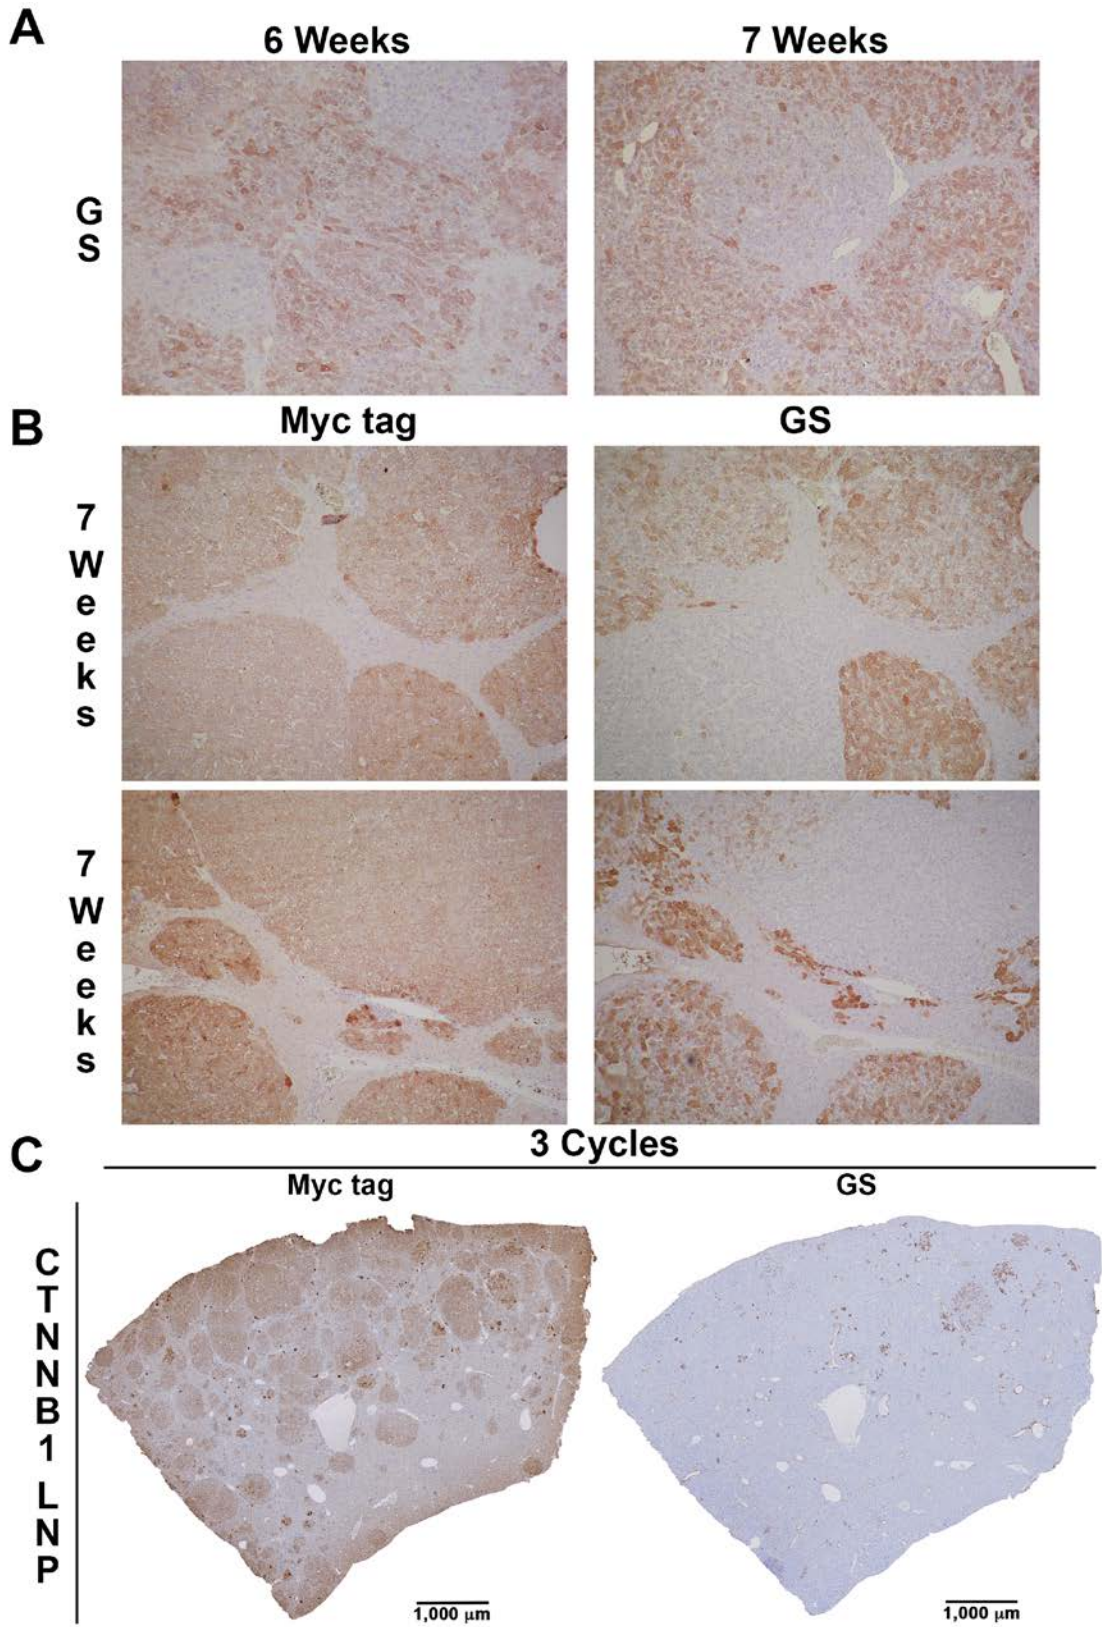

## E. ONLINE SUPPLEMENTARY FIGURE LEGENDS:

**ONLINE FIGURE 1: High molecular similarity between G12D-Kras-S33Y- $\beta$ -catenin and G12D-Kras-S45Y- $\beta$ -catenin models.** The correspondence between fold change in the G12D-Kras-S33Y- $\beta$ -catenin and G12D-Kras-S45Y- $\beta$ -catenin models is depicted as a scatter plot. Changes in both models were qualitatively similar but there were 82 genes that were significantly different (Q-value FDR <0.2) between the two models. There is a general trend towards the Kras+S45Y model producing changes of smaller magnitude. All significantly different genes are marked orange and the top 30 are labeled. The Pearson correlation coefficient is 0.91 (p-value <1e-16).

**ONLINE FIGURE 2: Rare mouse shows incomplete response to CTNNB1-LNP due to tumor heterogeneity and expansion of GS-negative tumors in K-Ras- $\beta$ -catenin.**

(A) Immunohistochemical staining of liver sections with GS from G12D-K-Ras-S45Y- $\beta$ -catenin mice at 6 and 7 weeks after injection showed occasional tumor nodules lacking GS staining.

(B) Immunohistochemical staining of serial liver sections with GS or Myc-tag from two G12D-K-Ras-S45Y- $\beta$ -catenin mice at 7 weeks after injection showed that all tumor nodules were Myc-tag positive, but a small subset of these mutant  $\beta$ -catenin containing tumor nodules were GS negative.

(C) Immunohistochemical staining of representative serial liver sections with GS or Myc-tag from G12D-K-Ras-S45Y- $\beta$ -catenin mice after 3 cycles of CTNNB1-LNP treatment

showed that the remained tumor nodules in one liver lobe were Myc-positive but almost exclusively GS-negative.
